# Supplementary material
Source: PubMed Central journal article supplement (PMC8368548)
Supplement: 40670_2021_1287_MOESM1_ESM.pdf [file 40670_2021_1287_MOESM1_ESM.pdf]

**Supplemental Tables:**

|                        | 2019 Course Design                                                                          | Planned 2020 Course Design                                                                  | 2020 Course Implementation (Post-COVID19)                                                             |
|------------------------|---------------------------------------------------------------------------------------------|---------------------------------------------------------------------------------------------|-------------------------------------------------------------------------------------------------------|
| Instructional Material | Face to Face Lectures Given by Instructors at Individual Campuses                           | <i>Pre-Recorded Lectures as Pre-work for In-Class Sessions</i>                              | <i>Pre-Recorded Lectures for Pre-work for to In-Class Sessions</i>                                    |
|                        | Case-Based Multiple Choice Small Group Sessions led by Instructor(s) at Individual Campuses | <i>In-Class Case and NBME Style Questions Given by Instructor(s) at Individual Campuses</i> | <b>Virtual Group Cases and Centralized NBME Style Questions Given led Content Expert Facilitators</b> |
|                        | Formative Week 5 & 6 Quizzes                                                                | <i>Updated Formative Week 5 &amp; 6</i>                                                     | <i>Updated Formative Week 5 &amp; 6 Quizzes</i>                                                       |
|                        |                                                                                             |                                                                                             |                                                                                                       |
| Outcome Data           |                                                                                             | <i>Per Session Feedback</i>                                                                 | <i>Per Session Feedback</i>                                                                           |
|                        |                                                                                             | <i>TopHat® Student Performance</i>                                                          | <b>TopHat® Student Performance</b>                                                                    |
|                        | Exam 3                                                                                      | <i>Updated Exam 3</i>                                                                       | <i>Updated Exam 3</i>                                                                                 |
|                        | Standardized NBME Final                                                                     | Standardized NBME Final                                                                     | <b>Course Management Committee Final Exam</b>                                                         |
|                        | <b>IUSM Standard End of Course Survey</b>                                                   | IUSM Standard End of Course Survey                                                          | IUSM Standard End of Course Survey                                                                    |
|                        |                                                                                             | <i>Facilitator Survey</i>                                                                   | <i>Facilitator Survey</i>                                                                             |

Supplemental Table 1: Course Design Summary. Planned 2020 revisions to the Psychiatry Curriculum of the Neuroscience and Behavior Course are depicted in *italics*. COVID-19 related changes in implementation are noted in **bold**. Thick bordered cells indicate data used in formal analyses. Exam 3 and the formative, ungraded quizzes and Exam 3 were updated to match the revised curriculum.

| Number of Sessions with Students Meeting Engagement Criteria | Number of students | % of class |
|--------------------------------------------------------------|--------------------|------------|
| 10                                                           | 259                | 69.4%      |
| 9                                                            | 47                 | 12.6%      |
| 8                                                            | 11                 | 2.9%       |
| 7                                                            | 7                  | 1.9%       |
| 6                                                            | 5                  | 1.3%       |
| 5                                                            | 5                  | 1.3%       |
| 4                                                            | 3                  | 0.8%       |
| 3                                                            | 1                  | 0.3%       |
| 2                                                            | 7                  | 1.9%       |
| 1                                                            | 13                 | 3.5%       |
| 0                                                            | 15                 | 4.0%       |

Supplemental Table 2. Distribution of student by non-response or zero response in the Top Hat® sessions. Students that had registered for the session but did not answer any questions in Top Hat or had not registered for the session were scored as without engagement for that session. Example: 259 students, or 69.4% of the class, engaged in all 10 sessions but 15 students, or 4% of the class, did not engage in any session.

| Session Day                 | Day 1          | Day 2               | Day 3              |                         |                       | Day 4                     |                                     |                  |                                    | Day 5             |         |
|-----------------------------|----------------|---------------------|--------------------|-------------------------|-----------------------|---------------------------|-------------------------------------|------------------|------------------------------------|-------------------|---------|
| Topic                       | Mood Disorders | Psychotic Disorders | Anxiety and Trauma | Substance Use Disorders | Personality Disorders | Somatic Symptom Disorders | Sexual Dysfunction/Gender Dysphoria | Eating disorders | Childhood and Adolescent Disorders | High Yield Review | Overall |
| Total Points                | 21             | 24                  | 17                 | 17                      | 10                    | 8                         | 10                                  | 8                | 21                                 | 7.5               | 143.5   |
| 25 <sup>th</sup> Percentile | 6              | 10.3                | 12                 | 11                      | 7                     | 5.5                       | 6                                   | 4.5              | 14.3                               | 5                 | 85      |
| 50 <sup>th</sup> Percentile | 12.5           | 17                  | 14                 | 14                      | 8                     | 6.5                       | 7.5                                 | 6                | 17.5                               | 6                 | 105.5   |
| 75 <sup>th</sup> Percentile | 15             | 19.5                | 15                 | 15.5                    | 9                     | 7                         | 8.5                                 | 7                | 19                                 | 6.5               | 36.2    |
| Average                     | 10.5           | 14.4                | 12.2               | 11.6                    | 7.1                   | 5.6                       | 6.6                                 | 5.2              | 14.5                               | 5.1               | 93.1    |
| Standard Deviation          | 5.7            | 7.0                 | 4.8                | 5.9                     | 3.0                   | 2.3                       | 3.1                                 | 2.5              | 6.8                                | 2.5               | 36.2    |
| Mode                        | 0              | 0                   | 15                 | 0                       | 8.5                   | 7                         | 8.5                                 | 7                | 0                                  | 6.5               | 0       |
| Total non-responders        | 66             | 49                  | 39                 | 69                      | 49                    | 46                        | 53                                  | 61               | 59                                 | 66                | 114     |

Supplemental Expanded Table 3: Top Hat® performance by Day and Topic. The High-Yield Review topic lecture contained one question erroneously entered at total points for correct answer as 0.5 pts instead of 1pt which left the total points per session as 7.5.

|                                   | The students were well prepared for the sessions: | The students were engaged in the sessions: |                      | What was your attitude towards the large group question/case sessions? |                             | The questions are: |
|-----------------------------------|---------------------------------------------------|--------------------------------------------|----------------------|------------------------------------------------------------------------|-----------------------------|--------------------|
| <b>Strongly Agree</b>             | 0.0%                                              | 0.0%                                       | <b>Very Positive</b> | 15.4%                                                                  | <b>Too Difficult</b>        | 0.0%               |
| <b>Somewhat Agree</b>             | 30.8%                                             | 53.9%                                      | <b>Positive</b>      | 46.2%                                                                  | <b>Mildly Too Difficult</b> | 0.0%               |
| <b>Neither Agree nor Disagree</b> | 38.5%                                             | 23.1%                                      | <b>Neutral</b>       | 38.5%                                                                  | <b>Just Right</b>           | 76.9%              |
| <b>Somewhat Disagree</b>          | 30.8%                                             | 23.1%                                      | <b>Negative</b>      | 0.0%                                                                   | <b>Mildly Too Easy</b>      | 23.1%              |
| <b>Strongly Disagree</b>          | 0.0%                                              | 0.0%                                       | <b>Very Negative</b> | 0.0%                                                                   | <b>Too Easy</b>             | 0.0%               |

Supplemental Table 4: Psychiatry Facilitator Responses to Course Survey, N=14/21(excluding PCRC members)

t-Test: Two-Sample Assuming Equal Variances

|                              | <i>2019</i> | <i>2020</i> |
|------------------------------|-------------|-------------|
| Mean                         | 4.21400778  | 4.36428571  |
| Variance                     | 0.69230302  | 0.68402458  |
| Observations                 | 257         | 280         |
| Pooled Variance              | 0.68798585  |             |
| Hypothesized Mean Difference | 0           |             |
| df                           | 535         |             |
| t Stat                       | -2.0973161  |             |
| P(T<=t) one-tail             | 0.01821715  |             |
| t Critical one-tail          | 1.64770676  |             |
| P(T<=t) two-tail             | 0.03643431  |             |
| t Critical two-tail          | 1.96440801  |             |

Supplemental Table 5: Two-tailed T-test results for Supplemental Figure 4: 2019 vs 2020 Standardized End of Course Evaluation Data. 2020 N=280, 2019 N=257. More students were either satisfied or strongly satisfied in 2020 compared to 2019 ( $p = 0.04$ ).

**Supplemental Figures:**

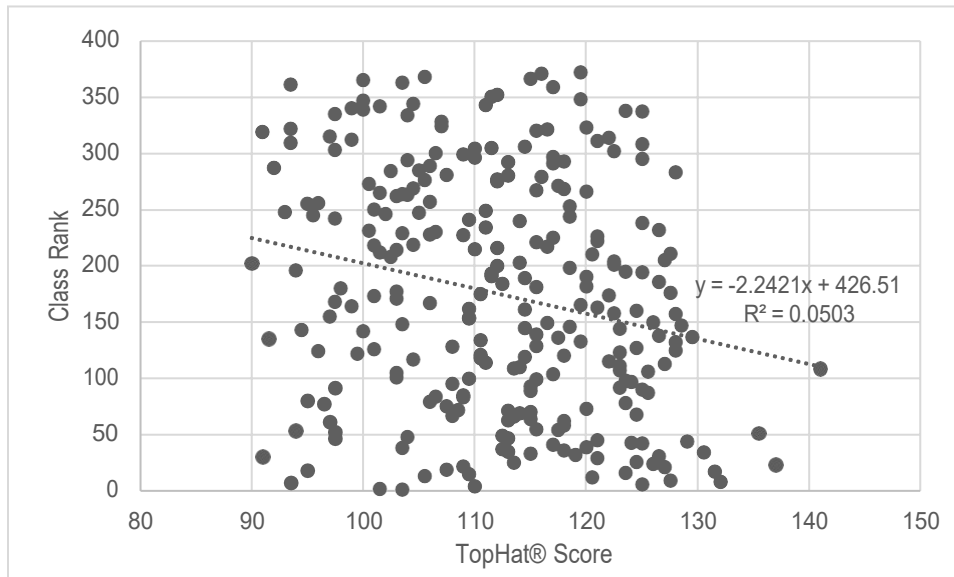

Supplemental Figure 1: Positive Performers (Greater than 90 points in Top Hat® score, n=261) versus Class Rank. Increasing Top Hat® score was related to better class rank (Class Rank of 1 is the highest performing student) ( $p = 2.5 \text{ e-}4$ ), but the overall explained variance is low.

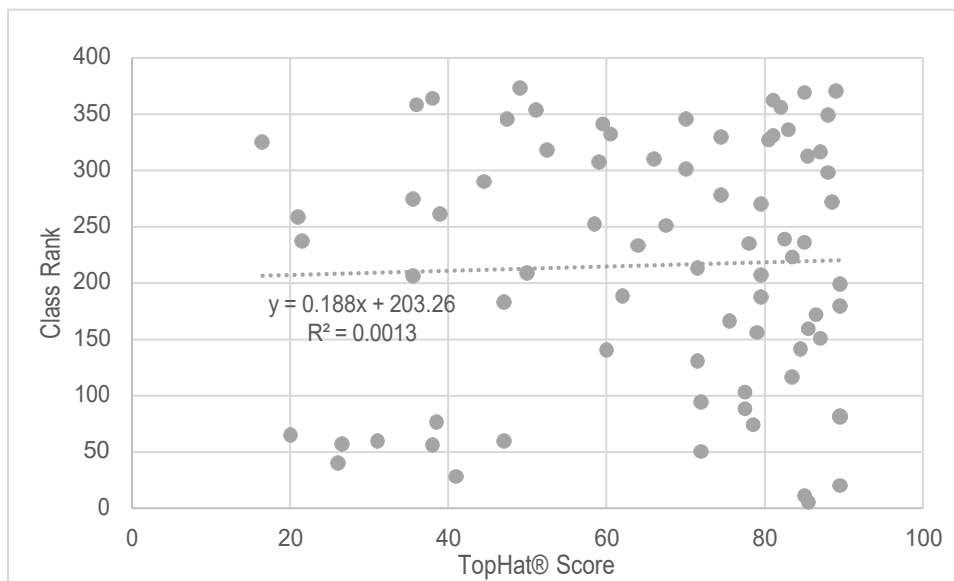

Supplemental Figure 2: Intermittent Performers (between 90 and 14 total points in Top Hat® score, n=75) versus Class Rank. Poor correlation and low overall explained variance between Top Hat® score and class rank (Class Rank of 1 is the highest performing student) ( $p = 0.75$ ).

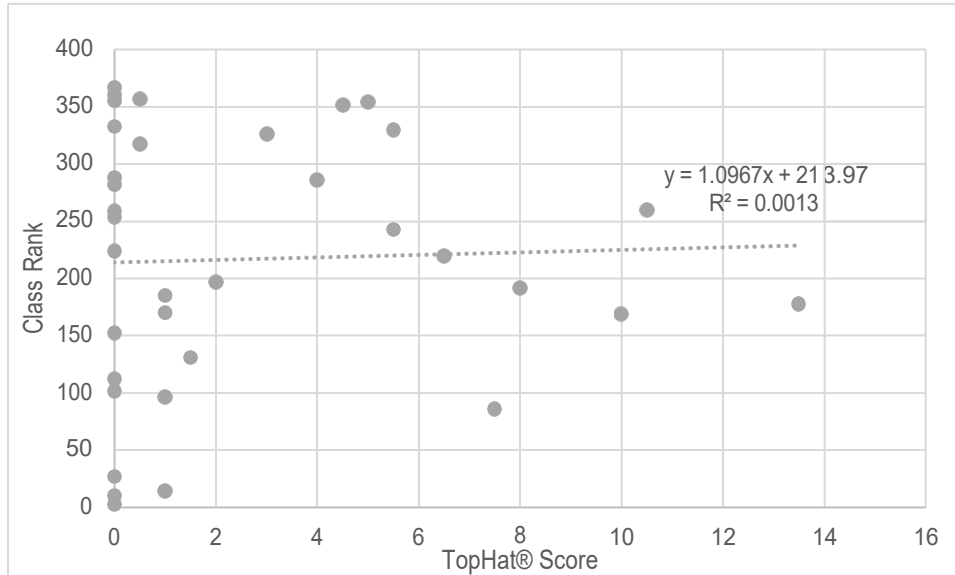

Supplemental Figure 3: Poor Performers/Non-Responders (less than 14 points in Top Hat® score, n=34) versus Class Rank. Poor correlation and low overall explained variance between Top Hat® score and class rank (Class Rank of 1 is the highest performing student) ( $p = 0.83$ ).

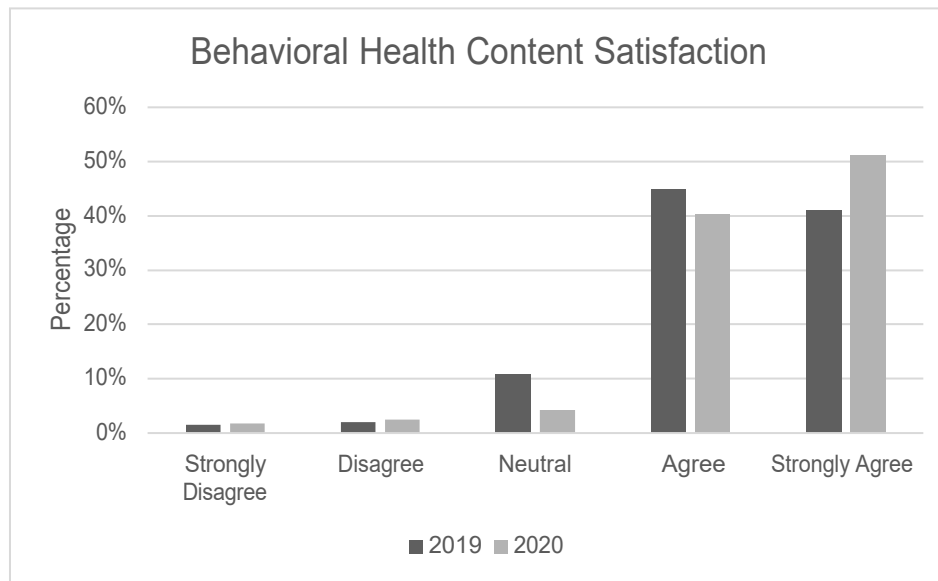

Supplemental Figure 4: 2019 vs 2020 Standardized End of Course Evaluation Data. 2020 N=280, 2019 N=257. More students were either satisfied or strongly satisfied in 2020 compared to 2019 ( $p = 0.04$ ).

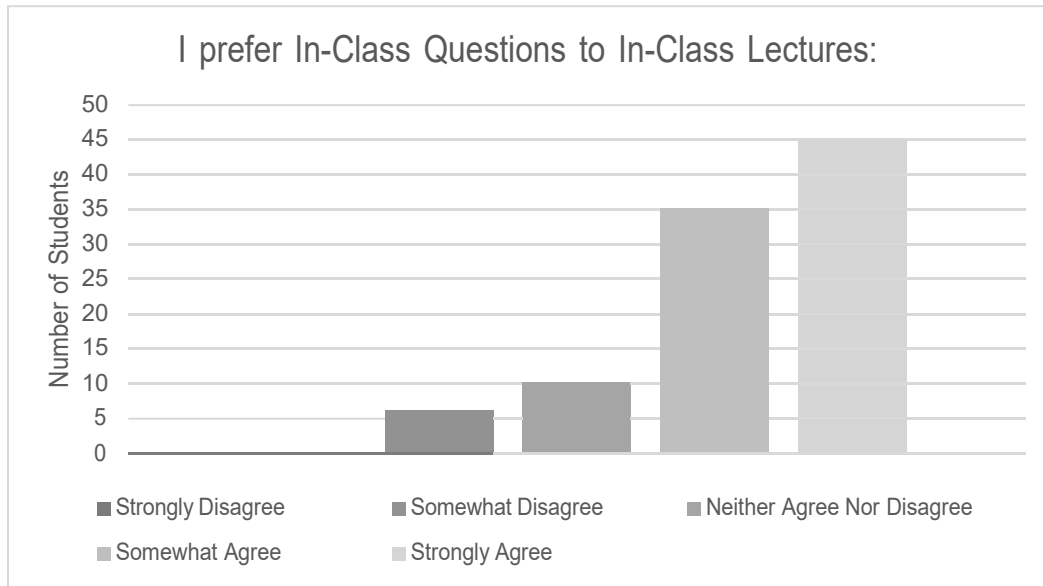

Supplemental Figure 5: MS1 results from Psychiatry-Specific Global Survey, N=113
